# Supplementary material for: Pharmacophore-Based Discovery of Substrates of a Novel Drug/Proton-Antiporter in the Human Brain Endothelial hCMEC/D3 Cell Line
Source: MDPI journal article supplement (doi:10.3390/pharmaceutics14020255), 2022-01-21
Supplement: s1 [file s1]

Maria Smirnova, Laura Goracci, Gabriele Cruciani, Laetitia Federici, Xavier Declèves, H  l  ne Chapy and Salvatore Cisternino

**Table S1.** List of compounds classified as substrate or non-substrate of the proton-antiporter according to direct evaluation (SUB, Substrate; N-S, Non-substrate; ND, Not documented;\* our unpublished data).

| Substrate*           | Status             | Non Substrate*     | Status                |
|----------------------|--------------------|--------------------|-----------------------|
| Clonidine            | SUB <sup>1,2</sup> | Morphine           | ND                    |
| Desomorphine         | ND                 | Nicotine           | SUB <sup>5</sup>      |
| Diphenhydramine      | SUB <sup>3,4</sup> | Agmatine           | N-S <sup>14</sup>     |
| Heroin               | ND                 | Choline            | N-S <sup>15</sup>     |
| Norbuprenorphine     | ND                 | Cimetidine         | N-S <sup>16</sup>     |
| Tramadol             | SUB <sup>5,6</sup> | Dihydromorphine    | ND                    |
| Verapamil            | SUB <sup>7</sup>   | Dopamine           | N-S <sup>17</sup>     |
| 6-monoacetylmorphine | ND                 | Ergothioneine      | N-S <sup>18</sup>     |
| Brimonidine          | SUB <sup>8</sup>   | Guanidine          | N-S <sup>19</sup>     |
| Cocaethylene         | ND                 | Histamine          | N-S <sup>17</sup>     |
| Cocaine              | SUB <sup>9</sup>   | L-dopa             | N-S <sup>20</sup>     |
| Codeine              | SUB <sup>10</sup>  | L-carnitine        | N-S <sup>21</sup>     |
| Methadone            | ND                 | Melatonin          | ND                    |
| Norcocaine           | ND                 | Milnacipran        | N-S *                 |
| Oxycodone            | SUB <sup>11</sup>  | MPP                | N-S <sup>17</sup>     |
| Pyrilamine           | SUB <sup>11</sup>  | N-methylnaloxone   | ND                    |
| Apomorphine          | SUB <sup>12</sup>  | Paraquat           | N-S <sup>22, 23</sup> |
| MDMA                 | SUB <sup>13</sup>  | Serotonin          | N-S <sup>17</sup>     |
| Naloxone             | SUB <sup>2</sup>   | Tetraethylammonium | N-S *                 |
| Hydromorphone        | ND                 | Tyramine           | ND                    |

<sup>1</sup>(Andre et al., 2009), <sup>2</sup>(Chapy et al., 2015), <sup>3</sup>(Auvity et al., 2016), <sup>4</sup>(Sadiq et al., 2011), <sup>5</sup>(Cisternino et al., 2013), <sup>6</sup>(Kitamura et al., 2014), <sup>7</sup>(Chapy et al., 2016), <sup>8</sup>(Zhang et al., 2006), <sup>9</sup>(Chapy et al., 2014), <sup>10</sup>(Fischer et al., 2010), <sup>11</sup>(Okura et al., 2008), <sup>12</sup>(Okura et al., 2013), <sup>13</sup>(Kuwayama et al., 2008), <sup>14</sup>(Wang et al., 2014), <sup>15</sup>(Allen and Smith, 2001), <sup>16</sup>(Murakami et al., 2000), <sup>17</sup>(Andre et al., 2012), <sup>18</sup>(Shimizu et al., 2015), <sup>19</sup>(Al-Khawaja et al., 2014), <sup>20</sup>(Kageyama et al., 2000), <sup>21</sup>(Berezowski et al., 2004), <sup>22</sup>(Bartlett et al., 2011), <sup>23</sup>(Vilas-Boas et al., 2014).

**Table S2.** Dataset used for the P1 pharmacophore validation and virtual screening based on the FLAP HOH similarity score descriptor.

| Compound             | Classification | Similarity Score | Compound         | Classification | Similarity Score |
|----------------------|----------------|------------------|------------------|----------------|------------------|
| Heroin               | G              | 0.23             | N-methylnaloxone | N-S            | 0.15             |
| Tramadol             | G              | 0.23             | Brimodine        | M-H            | 0.14             |
| Cocaethylene         | M-H            | 0.23             | Cimetidine       | N-S            | 0.14             |
| Cocaine              | M-H            | 0.23             | ergothioneine    | N-S            | 0.14             |
| Codeine              | M-H            | 0.22             | Dihydromorphine  | N-S            | 0.13             |
| Norcocaine           | M-H            | 0.22             | Verapamil        | G              | 0.12             |
| Methadone            | M-H            | 0.21             | L-dopa           | N-S            | 0.12             |
| Desomorphine         | G              | 0.2              | Clonidine        | G              | 0.11             |
| Diphenhydramine      | G              | 0.2              | Norbuprenorphine | G              | 0.11             |
| Hydromorphone        | W              | 0.19             | Apomorphine      | M-H            | 0.1              |
| Pyrimidine           | M-H            | 0.19             | Choline          | N-S            | 0.1              |
| MDMA                 | M-H            | 0.18             | Serotonin        | N-S            | 0.1              |
| L-carnitine          | N-S            | 0.18             | Dopamine         | N-S            | 0.09             |
| 6-Monoacetylmorphine | M-H            | 0.17             | Tyramine         | N-S            | 0.08             |
| Oxycodone            | M-H            | 0.17             | Agmatine         | N-S            | 0.07             |
| Naxolone             | M-L            | 0.17             | Histamine        | N-S            | 0.07             |
| Morphine             | W              | 0.17             | MPP              | N-S            | 0.03             |
| Nicotine             | W              | 0.17             | Paraquat         | N-S            | 0.03             |
| Melatonin            | N-S            | 0.16             | TEA              | N-S            | 0.03             |
| Milnacipran          | N-S            | 0.16             | Guanidine        | N-S            | 0                |

**Table S3.** Dataset used for pharmacophore P2 validation and virtual screening based on the FLAP H\*O\*H similarity score descriptor.

| Compound             | Classification | Similarity Score | Compound         | Classification | Similarity Score |
|----------------------|----------------|------------------|------------------|----------------|------------------|
| Methadone            | M-H            | 0.19             | Clonidine        | G              | 0.09             |
| Cocaethylene         | M-H            | 0.18             | Desomorphine     | G              | 0.09             |
| Heroin               | G              | 0.17             | Brimodinine      | M-H            | 0.09             |
| Diphenhydramine      | G              | 0.16             | L-carnitine      | N-S            | 0.09             |
| Pyrilamine           | M-H            | 0.16             | Norbuprenorphine | G              | 0.08             |
| Cocaine              | M-H            | 0.15             | Cimetidine       | N-S            | 0.08             |
| Naxolone             | M-L            | 0.15             | Milnacipran      | N-S            | 0.08             |
| Apomorphine          | M-H            | 0.15             | Morphine         | W              | 0.07             |
| Verapamil            | G              | 0.14             | Dihydromorphine  | N-S            | 0.07             |
| 6-monoacetylmorphine | M-H            | 0.13             | Choline          | N-S            | 0.06             |
| Oxycodone            | M-H            | 0.12             | L-dopa           | N-S            | 0.05             |
| Ergothioneine        | N-S            | 0.12             | Serotonin        | N-S            | 0.05             |
| Hydromorphone        | W              | 0.11             | Agmatine         | N-S            | 0.04             |
| N-methylnaloxone     | N-S            | 0.11             | Dopamine         | N-S            | 0.04             |
| Tramadol             | G              | 0.1              | Tyramine         | N-S            | 0.04             |
| Codeine              | M-H            | 0.1              | Histamine        | N-S            | 0.03             |
| Norcocaine           | M-H            | 0.1              | MPP              | N-S            | 0.03             |
| Nicotine             | W              | 0.1              | Paraquat         | N-S            | 0.03             |
| MDMA                 | M-H            | 0.1              | TEA              | N-S            | 0.03             |
| Melatonin            | N-S            | 0.1              | Guanidine        | N-S            | 0                |

**Table S4.** Substrate candidates after virtual screening on the Tropsha's database (A), the Recon2 Database (B) and the HMDB database (C), using pharmacophore P1 as a template.

| Candidate                                                   | SMILES                                                                                | Similarity score* |
|-------------------------------------------------------------|---------------------------------------------------------------------------------------|-------------------|
| Database (A)                                                |                                                                                       |                   |
| Methixene                                                   | <chem>CN1CCCC(CC2C3=CC=CC=C3SC3=CC=CC=C23)C1</chem>                                   | 0.23              |
| Dextromethorphan                                            | <chem>[H][C@]12CC3=C(C=C(OC)C=C3)[C@@]3(CCCC[C@]13[H])CCN2C</chem>                    | 0.23              |
| Laudanosine-6'-bromo                                        | <chem>COc1c(OC)cc(C[C@@H]2[NH+](C)CCc3cc(OC)c(OC)cc23)cc1</chem>                      | 0.22              |
| Cilazaprilat                                                | <chem>C1C[C@@H](C(=O)N2[C@@H](CCCN2C1)C(=O)O)N[C@@H](CCC3=CC=CC=C3)C(=O)O</chem>      | 0.22              |
| Benactyzine                                                 | <chem>CC[NH+](CC)CCOC(=O)C(O)(c1cccc1)c1cccc1</chem>                                  | 0.20              |
| CHEMBL131459                                                | <chem>CC(C)N(C[C@H](O)COc1c(C(=O)c2cccc2)c(C)nn1C)C(C)C</chem>                        | 0.20              |
| Venlafaxine                                                 | <chem>OC1([C@H](c2ccc(OC)cc2)C[NH+](C)C)CCCC1</chem>                                  | 0.19              |
| N-[2-(3,4-dimethoxyphenyl)ethyl]-1-methylpyrrolidin-2-imine | <chem>COc1ccc(CC/[NH+]=C/2CCCN2C)cc1OC</chem>                                         | 0.19              |
| CHEMBL339825                                                | <chem>CC(C)N(C[C@H](O)COc1c(C(=O)c2cccc2)c(C)nn1c1cccc1)C(C)C</chem>                  | 0.19              |
| Oxybutynin                                                  | <chem>O[C@](C1CCCCC1)(C(=O)OCC#CCN(CC)CC)c1cccc1</chem>                               | 0.19              |
| Database (B)                                                |                                                                                       |                   |
| Cocaine                                                     | <chem>C[NH+]1[C@H]2CC[C@@H]1[C@H]([C@@H](C2)OC(=O)c1cccc1)C(=O)OC</chem>              | 0.26              |
| (R)-4-phosphopantothenate                                   | <chem>CC(C)(CO)C/C(=N/CCC(=O)[O-])O)O</chem>                                          | 0.20              |
| N-Acetylmethionine                                          | <chem>[H][C@@](CCSC)(NC(C)=O)C(O)=O</chem>                                            | 0.20              |
| Database (C)                                                |                                                                                       |                   |
| Oxycodone                                                   | <chem>[NH2+][C@]1(C([C@@H]2C[C@H]1CC2)(C)C)C</chem>                                   | 0.38              |
| Oxymorphone                                                 | <chem>O1[C@@H]2[C@]34[C@](O)([C@H]([NH+](CC3)C)Cc3c4c1c(O)cc3)CCC2=O</chem>           | 0.31              |
| Naltrexone                                                  | <chem>O1[C@@H]2[C@]34[C@](O)([C@H]([NH+](CC3)CC3CC3)Cc3c4c1c(O)cc3)CCC2=O</chem>      | 0.27              |
| Hydrocodone                                                 | <chem>O1[C@@H]2[C@]34[C@H]([C@H]([NH+](CC3)C)Cc3c4c1c(OC)cc3)CCC2=O</chem>            | 0.26              |
| Naloxone                                                    | <chem>O1[C@@H]2[C@]34[C@](O)([C@H](N(CC3)CC=C)Cc3c4c1c(O)cc3)CCC2=O</chem>            | 0.26              |
| Thebaine                                                    | <chem>C1[NH+](C)[C@H]2Cc3ccc(c4c3[C@]3(C2=CC=C([C@H]3O4)OC)C1)OC</chem>               | 0.23              |
| 6-O-Methylcodeine                                           | <chem>O1[C@@H]2[C@H](C=C[C@H]3[C@@]42CC[NH+](C)[C@@H]3Cc2c4c1c(OC)cc2)OC</chem>       | 0.22              |
| Nalbuphine                                                  | <chem>c12c3c(c(cc1)O)O[C@H]1[C@H](CC[C@]4([C@H]([NH+](CC[C@]314)CC1CCC1)C2)O)O</chem> | 0.21              |
| Norbutorphanol                                              | <chem>C1CC[C@]2([C@H]3Cc4ccc(cc4[C@]2(C1)CC[NH2+])3)O)O</chem>                        | 0.20              |
| Butorphanol                                                 | <chem>O[C@@]12[C@]3(CC[NH+])([C@@H]1Cc1c3cc(O)cc1)CC1CCC1)CCCC2</chem>                | 0.19              |
| Hydromorphone                                               | <chem>O1[C@@H]2[C@]34[C@H]([C@H]([NH+](CC3)C)Cc3c4c1c(O)cc3)CCC2=O</chem>             | 0.19              |

\*According to the FLAP H\*O\*H descriptor

**Table S5.** Substrate candidates after virtual screening on the Tropsha's database (A), the Recon2 Database (B) and the HMDB database (C), using pharmacophore P2 as a template.

| Candidate                      | SMILES                                                                                                                        | Similarity Score* |
|--------------------------------|-------------------------------------------------------------------------------------------------------------------------------|-------------------|
| Database (A)                   |                                                                                                                               |                   |
| Trihexyphenidyl                | <chem>O[C@](CC[NH+]1CCCCC1)(C1CCCCC1)[C@H-]1[CH-][CH-][CH+][CH+][CH+]</chem>                                                  | 0.23              |
| Doxylamine                     | <chem>O(CC[NH+](C)C)[C@](c1ncccc1)(c1cccc1)C</chem>                                                                           | 0.22              |
| Thenylidamine                  | <chem>C[NH+](C)CCN(Cc1csc1)c1ncccc1</chem>                                                                                    | 0.19              |
| Methadone                      | <chem>O=C(C(c1cccc1)(c1cccc1)C[C@H]([NH+](C)C)C)CC</chem>                                                                     | 0.19              |
| D-617(metabolite of Verapamil) | <chem>CC(C)[C@](C#N)(c1cc(OC)c(OC)cc1)CCCNC</chem>                                                                            | 0.19              |
| Doxapram                       | <chem>O=C1N(CC)C[C@@H](CC[NH+]2CCOCC2)[C@@]1([C-]1[CH-][CH-][CH-][CH-][CH-][CH-][CH+][CH+][CH+][CH+][CH+][CH+])</chem>        | 0.19              |
| Chlorpromazine                 | <chem>Clc1cc2N(c3c(Sc2cc1)cccc3)CCC[NH+](C)C</chem>                                                                           | 0.18              |
| Antazoline                     | <chem>N1CC[NH+]=C1CN(Cc1cccc1)c1cccc1</chem>                                                                                  | 0.18              |
| Methixene                      | <chem>C[NH+]1CCC[C@H](C[C@@H]2[C@@H-]3[CH-][CH-][CH-][CH-][C@@H-]3S[C@@H+]3[C@H+]2[CH+][CH+][CH+][CH+])C1</chem>              | 0.17              |
| Zolamine                       | <chem>C[NH+](C)CCN(Cc1ccc(OC)cc1)c1nccs1</chem>                                                                               | 0.17              |
| Methapyrilene                  | <chem>C[NH+](C)CCN(Cc1cccc1)c1cccn1</chem>                                                                                    | 0.17              |
| Fenipramide                    | <chem>C1CC[NH+](CC1)CCC(C(=O)N)(c1cccc1)c1cccc1</chem>                                                                        | 0.17              |
| Gamfexine                      | <chem>C[NH+](C)CC[C@H](C1CCCCC1)c1cccc1</chem>                                                                                | 0.16              |
| Laudanosine-6f-bromo           | <chem>COc1c(OC)cc(C[C@@H]2[NH+](C)CCc3cc(OC)c(OC)cc23)cc1</chem>                                                              | 0.16              |
| Pheniramine                    | <chem>n1cccc1[C@@H](c1cccc1)CC[NH+](C)C</chem>                                                                                | 0.16              |
| Imipramine                     | <chem>c1cc2c(cc1)CCc1c(ccc1)N2CCC[NH+](C)C</chem>                                                                             | 0.16              |
| Promazine                      | <chem>S1c2cccc2N(c2c1cccc2)CCC[NH+](C)C</chem>                                                                                | 0.16              |
| Procyclidine                   | <chem>O[C@](c1cccc1)(CC[NH+]1CCCCC1)C1CCCCC1</chem>                                                                           | 0.16              |
| Buflomedil                     | <chem>COc1cc(OC)c(C(=O)CCC[NH+]2CCCC2)c(OC)c1</chem>                                                                          | 0.16              |
| Amitriptyline                  | <chem>c1cc2c(/C(=C/CC[NH+](C)C)c3c(cccc3)CC2)cc1</chem>                                                                       | 0.16              |
| Ungerine                       | <chem>CO[C@H]1C=C2CC[NH+](C)[C@H]2[C@H]2[C@@H]1OC(=O)c1cc3c(OCO3)cc21</chem>                                                  | 0.15              |
| Levophacetoperane              | <chem>CC(=O)O[C@H]([C@H]1CCCC[NH2+]1)c1cccc1</chem>                                                                           | 0.15              |
| Chlorpheniramine               | <chem>Clc1ccc(cc1)[C@@H](c1ncccc1)CC[NH+](C)C</chem>                                                                          | 0.15              |
| ChemSpiderID23281049           | <chem>O=C1C[C@H](C[NH+]2CCCCC2)Oc2cccc12</chem>                                                                               | 0.15              |
| Isopropamide                   | <chem>NC(=O)C(CC[NH+](C(C)C)C(C)C)(c1cccc1)c1cccc1</chem>                                                                     | 0.15              |
| Xylometazoline                 | <chem>N1CC[NH+]=C1Cc1c(C)cc(cc1C)C(C)(C)C</chem>                                                                              | 0.15              |
| Delcorine                      | <chem>O[C@@H]1[C@H]2[C@@]34[C@H]5C[C@@H]6[C@@H](OC)[C@H]5[C@]5(C[C@@H]6OC)OCO[C@@]15[C@@H]3N(CC)C[C@]2(COC)CC[C@@H]4OC</chem> | 0.15              |
| Protriptyline                  | <chem>c1cc2c(C=Cc3c(ccc3)C2CCC[NH2+]C)cc</chem>                                                                               | 0.14              |
| NSC-664565                     | <chem>[NH+]1=C(NCC1)CN1[C@H](C)[C@H](C)C=C(C)c2cccc12</chem>                                                                  | 0.14              |
| Vincamine                      | <chem>O[C@]1(C[C@@]2(CC)CCC[NH+]3CCc4c([C@@H]23)n1c1cccc41)C(=O)OC</chem>                                                     | 0.14              |
| Doxepin                        | <chem>O1c2cccc2/C(=C/CC[NH+](C)C)c2c(cccc2)C1</chem>                                                                          | 0.14              |
| Eburnamonine                   | <chem>CC[C@@]12CCC[NH+]3CCc4c([C@H]13)n(c1cccc41)C(=O)C2</chem>                                                               | 0.14              |

|                                            |                                                                                     |      |
|--------------------------------------------|-------------------------------------------------------------------------------------|------|
| Desipramine                                | <chem>c1cc2c(cc1)CCc1c(cccc1)N2CCC[NH2+]C</chem>                                    | 0.14 |
| Promethazine                               | <chem>S1c2ccccc2N(c2c1cccc2)C[C@@H]([NH+](C)C)C</chem>                              | 0.13 |
| Aminopentamide                             | <chem>C[C@H](CC(C(=O)N)(c1ccccc1)c1ccccc1)[NH+](C)C</chem>                          | 0.13 |
| Disopyramide                               | <chem>NC(=O)[C@](c1ccccc1)(c1ccccc1)CC[NH+](C(C)C)C(C)C</chem>                      | 0.13 |
| Oxymetazoline                              | <chem>Oc1c(cc(C)c(C2=[NH+]CCN2)c1C)C(C)(C)C</chem>                                  | 0.13 |
| Maprotiline                                | <chem>CNCCCC12CCC(C3=CC=CC=C13)C1=CC=CC=C21</chem>                                  | 0.13 |
| Database (B)                               |                                                                                     |      |
| Cocaine                                    | <chem>C[NH+]1[C@H]2CC[C@@H]1[C@H]([C@@H](C2)OC(=O)c1ccccc1)C(=O)OC</chem>           | 0.14 |
| 6-Hydroxymelatonin                         | <chem>C/C(=N/CCc1c[nH]c2cc(c(cc12)OC)O)O</chem>                                     | 0.14 |
| Database (C)                               |                                                                                     |      |
| Methadone                                  | <chem>O=C(C(C[C@@H]([NH+](C)C)C)(c1ccccc1)c1ccccc1)CC</chem>                        | 0.20 |
| Norpropoxyphene                            | <chem>CCC(=O)O[C@](Cc1ccccc1)([C@@H](C)C[NH2+]C)c1ccccc1</chem>                     | 0.19 |
| Hydromorphone-3-sulphate                   | <chem>C[NH+]1CC[C@]23[C@@H]4Oc5c(OS(=O)(=O)[O-])ccc(C[C@@H]1[C@H]2CCC4=O)c35</chem> | 0.18 |
| noracymethadol                             | <chem>CC[C@H](C(C[C@@H](C)[NH2+]C)(c1ccccc1)c1ccccc1)OC(=O)C</chem>                 | 0.17 |
| Isothipendyl                               | <chem>S1c2c(N(C[C@@H]([NH+](C)C)C)c3ncccc13)cccc2</chem>                            | 0.17 |
| Nor-Levomethadyl acetate                   | <chem>CC[C@@H](C(C[C@@H](C)[NH2+]C)(c1ccccc1)c1ccccc1)OC(=O)C</chem>                | 0.16 |
| Ritalinic acid                             | <chem>c1ccc(cc1)[C@@H]([C@H]1CCCC[NH2+]1)C(=O)[O-]</chem>                           | 0.16 |
| Triprolidine                               | <chem>[NH+]1(CCCC1)C/C=C(/c1ccc(cc1)C)c1ncccc1</chem>                               | 0.16 |
| Hydrocodone                                | <chem>O1[C@@H]2[C@]34[C@H]([C@H]([NH+](CC3)C)Cc3c4c1c(OC)cc3)CCC2=O</chem>          | 0.15 |
| (R)-Laudanidine                            | <chem>CN1CCc2cc(c(cc2[C@@H]1Cc1ccc(c(c1)O)OC)OC)OC</chem>                           | 0.15 |
| Sibutramine                                | <chem>Clc1ccc(C2(CCC2)[C@@H]([NH+](C)C)CC(C)C)cc1</chem>                            | 0.15 |
| Diphenhydramine                            | <chem>C(OCC[NH+](C)C)(c1ccccc1)c1ccccc1</chem>                                      | 0.14 |
| Propylhexedrine                            | <chem>C[C@H](CC1CCCCC1)[NH2+]C</chem>                                               | 0.14 |
| Amdinocillin                               | <chem>[C@@H]1([C@@H]2N(C1=O)[C@H](C(S2)(C)C)C(=O)[O-])/[NH+]=C/N1CCCCC1</chem>      | 0.14 |
| Doxepin                                    | <chem>C1(=C\CC[NH+](C)C)/c2c(COc3c1cccc3)cccc2</chem>                               | 0.14 |
| Oxycodone                                  | <chem>O1[C@@H]2[C@]34[C@](O)([C@H](N(CC3)C)Cc3c4c1c(OC)cc3)CCC2=O</chem>            | 0.14 |
| Mecamylamine                               | <chem>[NH2+]([C@]1(C([C@@H]2C[C@H]1CC2)(C)C)C)C</chem>                              | 0.14 |
| 3-Isothiocyanatomethyl-1-methoxy-1H-indole | <chem>COnc1cc(C[NH+]=C=S)c2ccccc12</chem>                                           | 0.13 |
| 3-Methoxymorphinan                         | <chem>[C@@]123c4c(C[C@@H]([C@H]1CCCC3)[NH2+]CC2)ccc(c4)OC</chem>                    | 0.13 |

\*According to the FLAP H\*O\*H descriptor

**B. Supplementary Figure**

(a)

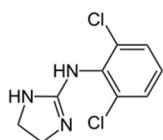

clonidine

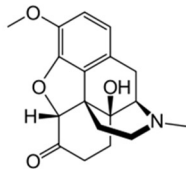

oxycodone

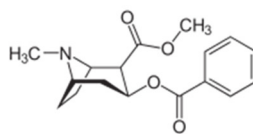

cocaine

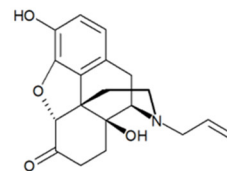

naxolone

(b)

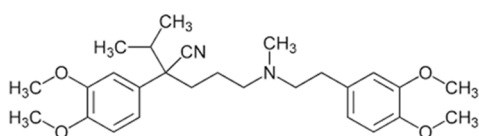

verapamil

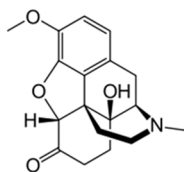

oxycodone

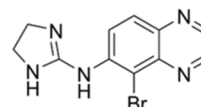

brimonidine

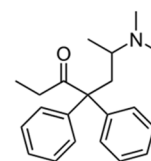

methadone

**Figure S1:** Chemical structures of drugs used for the generation of pharmacophore P1(a) and P2 (b).

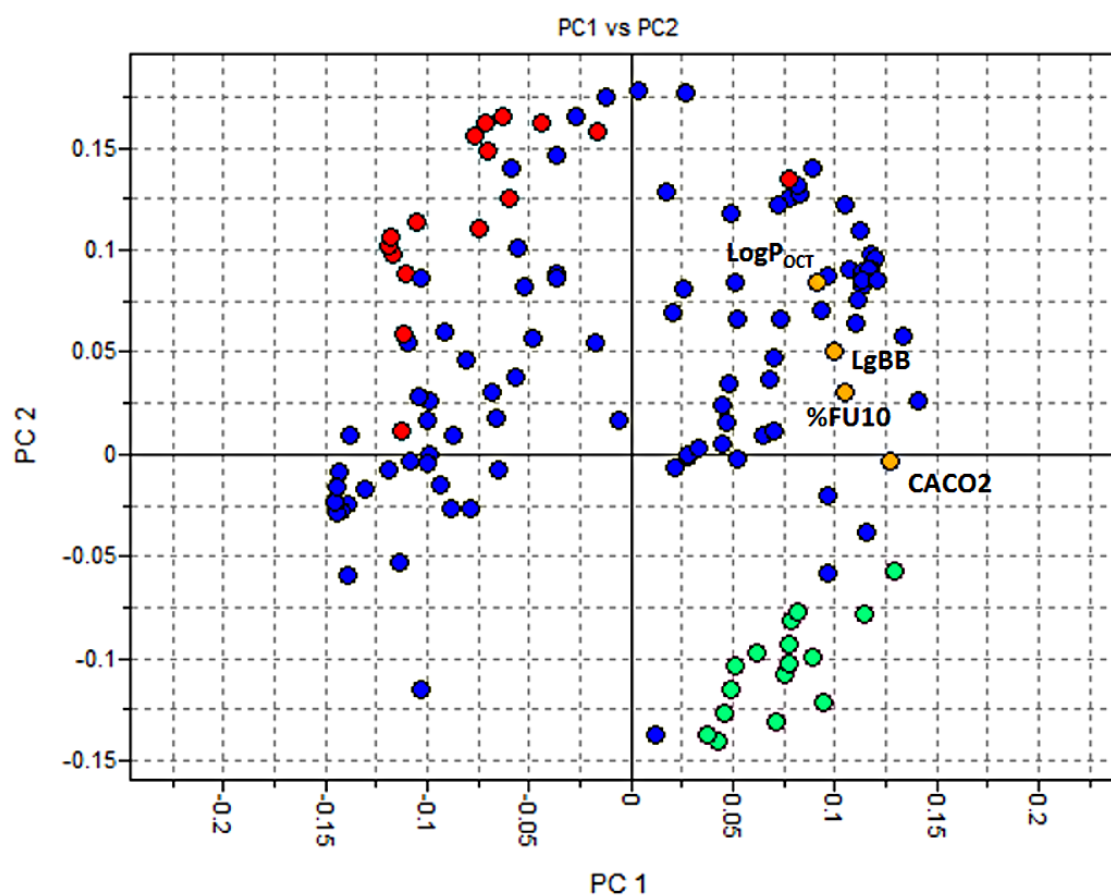

**Figure S2:** Loading plot for the PCA model generated for substrates and non-substrates of the proton antiporter. Hydrophilic descriptors (W1-W8, CW1-CW8) are red colored, while hydrophobic descriptors (D1-D8, CD1-CD8) are green colored. Additional descriptors discussed in the manuscript are highlighted in orange color. The other VolSurf+ descriptors are shown in blue. A detailed description of the descriptors has been reported elsewhere (Chapy et al., 2015).



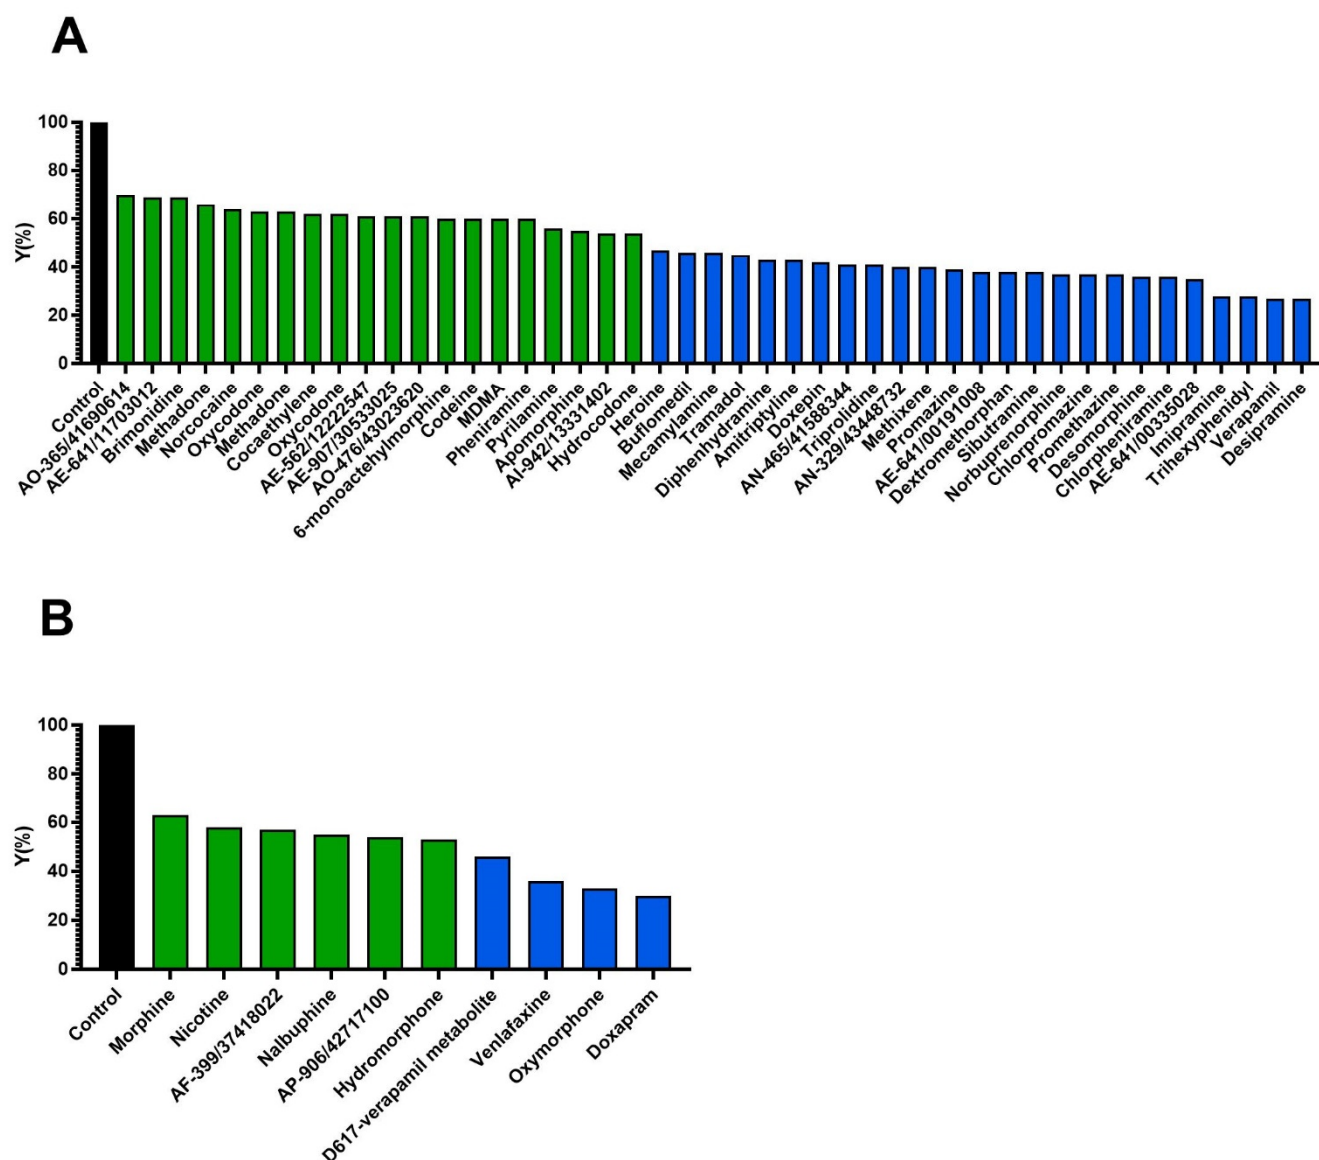

**Figure S3:** Substrate candidates Y(%) measured at 10 or 100  $\mu$ M by the [ $^3$ H]-clonidine trans-stimulation experiments in hCMEC/D3 cells; **(A)** Y is the percent of intracellular [ $^3$ H]-clonidine compared to control experiment (without unlabelled drug) obtained with substrate candidate at 10  $\mu$ M (blue, “Good” substrate; green, “Medium-high” substrate); **(B)** Y is the percent of intracellular [ $^3$ H]-clonidine compared to control experiment (without unlabelled drug) obtained with substrate at 100  $\mu$ M (blue, “Weak” substrate; green, “Medium-low” substrate).
